# Supplementary material for: New flavors from old wheats: exploring the aroma profiles and sensory attributes of local Mediterranean wheat landraces
Source: Front Nutr. 2023 May 18;10:1059078. doi: 10.3389/fnut.2023.1059078 (PMC10234510; doi:10.3389/fnut.2023.1059078)
Supplement: Supplementary Table S2 — The aroma and taste of flours tested in this work (2019–2020), including comparison between bread wheat and durum landrace and modern cultivars (n = 3–4, means ± SE), odor descriptors (mined from www.thegoodscentscompany.com), odor thresholds (in μg/g), and odor activity values (OAVs, values >1 are marked with “O”). Aroma concentrations are expressed as μg/gr, taste compound values are expressed as the ratio between the peak area of the compound and that of the internal standard (ribitol). Refined or whole landrace flours were compared to those of modern ones using Dunnet's multiple comparison test results (compare with control). Significant comparisons are marked with an asterisk (*p < 0.05). Statistical analysis was executed using “R” package “DescTools”. [file Table_2.xlsx]

## Sheet: Sheet1
	O - OAV>1 (putative odor-active compound				Triticum aestivum														Triticum durum
					Kandaharia		Karun		Lubnani kisra		Palestinskaya		Diar-Alla		Juljuli		Gadish		Hittia Soada		8238		Gaza		C-9
Compound	Class	Odor/taste type 1	OT [μg/g]	Source	Whole	Refined	Whole	Refined	Whole	Refined	Whole	Refined	Whole	Refined	Whole	Refined	Whole	Refined	Whole	Refined	Whole	Refined	Whole	Refined	Whole	Refined
Aroma compounds
(E)-non-2 enal	Fatty acid derivatives	fatty	8e-05	2	0.0006±0.0002* O	0.0023±0.0015* O	0.0004±0.0001 O	0.0007±0.0003 O	0.0005±0.0001 O	0.0006±0.0002 O	0.0005±0.0001 O	0.0006±0.0001 O	0.0005±0.0001 O	0.0017±0.0009 O	0.001±0.0002 O	0.0004±0.0001 O	0	0	0.0001±0 O	0.0111±0.0061 O	0.0025±0.0001* O	0.1672±0.0258* O	0.0006±0.0001 O	0.0002±0.00004 O	0.0004±0.0001 O	0.0008±0.0003 O
(E)-oct-2-enal	Fatty acid derivatives	fatty	0.003	2	0.0017±0.0005	0.0083±0.006 O	0.0012±0.0002	0.0021±0.001	0.0017±0.0004	0.0017±0.0004	0.0013±0.0005	0	0.0011±0.0002	0.0042±0.0028 O	0.0019±0.0005	0.0006±0.0001	0	0	0*	0*	0*	0*	0.0007±0.0001	0	0.0004±0.00003	0.0008±0.0004
(R,S)-5-Ethyl-6-methyl-3E-hepten-2-one	Fatty acid derivatives	fresh			0.0006±0.0002*	0.0011±0.0005*	0.0012±0.0002	0	0.0005±0.0001	0.0002±0.0001	0.0005±0.0001	0	0.0007±0.0001	0.0004±0.0004	0.0016±0.0003*	0.0002±0.00002*	0	0	0	0	0.0024±0.0001*	0.1165±0.0114*	0.0008±0.0001	0	0.0011±0.00001	0.0002±0.0001
1-Butanol, 2-methyl-	Fatty acid derivatives	roasted	0.5	3	0.0003±0.0001	0.002±0.0016	0.0003±0.0001	0.0309±0.0136	0.0006±0.0002	0.0004±0.0001	0.0012±0.0005	0	0.0003±0	0.0004±0.0004	0.0007±0.0002	0.001±0.0002	0.0007±0.0003	0.0038±0.0018	0.0003±0.0001	0.046±0.022	0	0	0.0005±0.0002	0.0003±0.0001	0	0
1-Heptanol	Fatty acid derivatives	green	0.003	2	0	0	0	0	0.0011±0.0003	0	0	0	0	0	0.0034±0.001* O	0	0	0	0*	0*	0*	0*	0.0008±0.0003*	0*	0.0012±0.0001	0.0077±0.0032 O
1-Hexanol	Fatty acid derivatives	herbal	0.5	3	0.0111±0.0045	0.0768±0.0405	0.0315±0.0053	0.1117±0.0514	0.0271±0.0047	0.0493±0.0176	0.0408±0.017	0.0226±0.0091	0.0504±0.0048	0.1692±0.1069	0.0378±0.0076	0.0314±0.0056*	0.0366±0.01	0.2842±0.133	0.0117±0.0026	0.9532±0.8518 O	0.0007±0.00002	0.0045±0.0045	0.0398±0.0105	0.021±0.0027	0.03±0.0047	0.0563±0.0316
1-nonanol	Fatty acid derivatives	floral	0.0009	4	0	0	0	0	0.0009±0.0002*	0.0006±0.0002*	0	0	0	0	0	0	0	0	0*	0*	0*	0*	0.001±0.0002 O	0.0003±0.00005	0.0013±0.0001 O	0.0009±0.0004
1-Octanol	Fatty acid derivatives	waxy	0.11	3	0.0024±0.0007	0.0094±0.0065	0.0025±0.0003	0.0052±0.0024	0.0031±0.0006	0.0025±0.0007	0.0042±0.0014	0.0012±0.0005	0.0029±0.0005	0.0078±0.0055	0.005±0.0011	0.0033±0.0005	0.0041±0.0008	0.0046±0.0046	0.0011±0.0002*	0*	0*	0*	0.0026±0.0006*	0*	0.0037±0.0002	0.0034±0.0018
1-Octen-3-ol	Fatty acid derivatives	earthy	0.001	2	0.0191±0.0067	0.1034±0.0726	0.0142±0.0021 O	0.054±0.0266 O	0.032±0.0076 O	0.0428±0.0142 O	0.0415±0.0153 O	0.0248±0.0107 O	0.0197±0.0049 O	0.1284±0.0956 O	0.0295±0.009 O	0.0186±0.0039 O	0.0112±0.0012 O	0.1301±0.0644 O	0.0045±0.0014 O	0.2747±0.2182 O	0	0	0.0191±0.005 O	0.0146±0.0002 O	0.0143±0.0002 O	0.0426±0.0215 O
1-Pentanol	Fatty acid derivatives	fermented	4		0.0099±0.0033	0.0807±0.06	0.013±0.0029	0.0666±0.0306	0.0223±0.0036	0.0377±0.0121	0.0314±0.0124	0.0164±0.008	0.022±0.0033	0.1169±0.0772	0.0326±0.0124	0.05±0.0125	0.0334±0.0117	0.4035±0.2114	0.0084±0.0021	1.1398±0.9745	0	0	0.0196±0.0066	0.0183±0.0021	0.0154±0.0021	0.0383±0.0223
2,3-Octanedione	Fatty acid derivatives	dill	0.012	5	0.0099±0.0029	0.0646±0.0472 O	0.0067±0.0004	0.0275±0.014 O	0.0138±0.0034 O	0.0186±0.0059 O	0.0172±0.0062 O	0.0093±0.0041 O	0.0083±0.0018	0.054±0.0383 O	0.0141±0.0044 O	0.0083±0.0009	0.0052±0.0005	0.0599±0.0284 O	0.0021±0.0006	0.2855±0.1568 O	0	0	0.0093±0.0022	0.0064±0.0003	0.0059±0.0004	0.0162±0.0089 O
2,4-Nonadienal	Fatty acid derivatives	green	9e-05	6	0.0022±0.0006* O	0.0163±0.0068* O	0	0	0	0	0	0	0	0	0	0	0	0	0.0012±0.0003 O	0.1317±0.0796 O	0.0019±0.0001 O	0.0548±0.0154 O	0	0	0	0
2-Butanone, 3-methyl-	Fatty acid derivatives	pleasant	0.5	6	0.0018±0.0004*	0.006±0.003*	0.0019±0.0004	0.0106±0.0048	0.0021±0.0005*	0.0045±0.0016*	0.0049±0.002*	0.0026±0.0006*	0.0026±0.0003*	0.0008±0.0008*	0*	0*	0.0044±0.001	0.0397±0.019	0.0013±0.0005	0.2639±0.1247	0.0024±0.0004	0.0956±0.0016	0.0034±0.0011	0	0.0024±0.0003	0.0044±0.003
2-Heptanone	Fatty acid derivatives	cheesy	0.0068	4	0.0024±0.001	0.0125±0.0076 O	0.0033±0.0008	0.0115±0.0051 O	0.0032±0.0006	0.0064±0.002	0.0037±0.0015	0.0025±0.0007	0.0032±0.0001	0.0151±0.0093 O	0.0047±0.0014	0.0025±0.0006	0.0022±0.0006 O	0.0177±0.009	0.001±0.0003 O	0.0365±0.0204	0	0	0.0034±0.0011	0.0022±0.0002	0.0021±0.0004	0.0061±0.0039
2-Heptanone, 4,6-dimethyl-	Fatty acid derivatives				0.0006±0.0002	0.0006±0.0006	0.0011±0.0002	0	0.0008±0.0002	0	0	0	0.0006±0.0001	0	0.0017±0.0005	0	0	0	0*	0*	0*	0*	0.0009±0.0002	0	0.0013±0.00003	0.0003±0.0002
2-Heptanone, 6-methyl-	Fatty acid derivatives				0.0004±0.0001	0	0.0005±0.0001	0	0	0	0	0	0	0	0.0005±0.0002	0	0.0005±0.0001	0	0	0	0	0	0.0003±0.0001	0	0.0003±0	0
2-Heptenal, (E)-	Fatty acid derivatives	green	0.013	6	0.0049±0.0012	0.0314±0.0232 O	0.0022±0.0002	0.0082±0.0042	0.0034±0.0007	0.0072±0.003	0.0026±0.0009	0.0017±0.0005	0.002±0.0004	0.0102±0.0074	0.0044±0.0014	0.0014±0.0003	0.0015±0.0001	0.0145±0.0064 O	0	0	0.0004±0.0001*	0.0181±0.0045* O	0.0008±0.0001	0.0006±0.0001	0.0006±0.00005	0.0017±0.001
2-Hexenal, (E)-	Fatty acid derivatives	green	0.11	3	0.0005±0.0001	0.0027±0.0018	0.0005±0.0001	0	0.0007±0.00003	0.0022±0.0019	0	0	0	0	0.001±0.0002	0	0	0	0	0	0.0003±0*	0.0123±0.0003*	0	0	0	0
2-Octen-1-ol, (E)-	Fatty acid derivatives	green	0.0004	7	0.0007±0.0002 O	0.0036±0.0025 O	0.0005±0.00004 O	0.0018±0.0008 O	0.0009±0.0002 O	0.0011±0.0003 O	0.0008±0.0003 O	0.0009±0.0003 O	0.0006±0.0001 O	0.0038±0.0021 O	0.0007±0.0002 O	0.0011±0.0003 O	0	0	0	0	0.0007±0 O*	0.0459±0.0137* O	0.0004±0.0002 O	0.0005±0.00003 O	0.0004±0.00002	0.0016±0.0008 O
2-Pentanone	Fatty acid derivatives	fruity	70	6	0.0138±0.0019*	0.0414±0.0193*	0.0175±0.0039*	0.0525±0.0214*	0.0181±0.0005*	0.0267±0.0086*	0.036±0.0135*	0.0212±0.0049*	0	0.089±0.0356	0.0276±0.0075	0.0544±0.0106	0.0307±0.0066	0.3023±0.1331	0.0134±0.0014	1.1065±0.5898	0.0036±0.0004	0.1287±0.0292	0.0232±0.007	0.0164±0.0022	0.0168±0.0017	0.0307±0.0151
3,5-Octadien-2-one	Fatty acid derivatives	fatty	0.0005	6	0	0	0	0	0.0024±0.0005* O	0.0038±0.0012* O	0.0029±0.001* O	0.0017±0.0006* O	0	0	0.0023±0.0007* O	0.002±0.0004* O	0	0	0	0	0.0069±0.0017 O*	0.2232±0.043* O	0.0017±0.0005 O	0.0011±0.0001 O	0.0009±0.0001 O	0.0027±0.0014 O
3-Octen-2-one	Fatty acid derivatives	earthy			0.0038±0.0012	0.0184±0.0127	0.0025±0.0004	0.0084±0.0042	0.0059±0.0015	0.0083±0.0025	0.0048±0.0014	0.0024±0.0008	0.0026±0.0006	0.0105±0.0068	0.0041±0.0013	0.0024±0.0007	0.0014±0.0001	0.0181±0.0081	0.0008±0.0003	0.0366±0.0174	0	0	0.0028±0.0007	0.002±0.0001	0.0013±0.0001	0.0044±0.0028
3-Pentanone	Fatty acid derivatives	ethereal	70	8	0.0135±0.002	0.0481±0.0263	0.0161±0.0038	0.0482±0.0198	0.0185±0.0012*	0.0266±0.0088*	0.0321±0.0113*	0.0194±0.0053*	0.0166±0.0016	0.0615±0.044	0.0296±0.0085	0.0502±0.0108	0.0307±0.0066	0.2576±0.1158	0.0124±0.0016	0.7228±0.5418	0.0151±0.001	0	0.0224±0.0067	0.0161±0.0025	0.0164±0.0014	0.0288±0.0143
3-Pentanone, 2-methyl-	Fatty acid derivatives	Mint			0.0026±0.0003	0.0049±0.0006	0.0036±0.001	0.008±0.0034	0.003±0.0001	0.0031±0.0012	0*	0*	0.003±0.0003	0.0082±0.0041	0.0049±0.0013	0.0046±0.001	0.0033±0.0005	0.0156±0.007	0.002±0.0003*	0.066±0.0286	0.0418±0.0105	1.9295±0.1515*	0.003±0.0009*	0.0018±0.0003	0.0028±0.0003	0.0053±0.0025
Butanal, 2-methyl-	Fatty acid derivatives	chocolate	0.0009	9	0	0	0	0	0	0	0	0	0	0	0	0	0	0	0	0	0	0	0.0006±0.0001*	0.0003±0*	0	0
Butanoic acid, 2-methyl-, methyl ester	Fatty acid derivatives	fruity	0.00025	6	0.0023±0.0002 O	0.0039±0.0006 O	0.0026±0.0005 O	0.0045±0.0015 O	0.0029±0.0001 O	0.0027±0.0007 O	0.0047±0.0014 O	0.0021±0.0003 O	0.0027±0.0002 O	0.0063±0.0032 O	0.0031±0.0008 O	0.0022±0.0006 O	0.0019±0.0002 O	0.0089±0.0036 O	0.0017±0.0002 O	0.037±0.0173 O	0	0	0.0023±0.0006 O	0.0013±0.0002 O	0.0029±0.0003 O	0.0045±0.0022 O
Butanoic acid, methyl ester	Fatty acid derivatives	fruity	0.0071	4	0.0057±0.0006	0.0126±0.0042 O	0.0065±0.0012	0.0165±0.0063 O	0.0065±0.0001	0.0083±0.0022 O	0.0115±0.0038 O	0.0074±0.0019 O	0.0056±0.0005	0.0164±0.011 O	0.0086±0.0022 O	0.0106±0.0028 O	0.0064±0.0009	0.0467±0.0195 O	0.0037±0.0005	0.1601±0.0754 O	0	0	0.0065±0.0018	0.0043±0.0006	0.0053±0.0005	0.0088±0.0042 O
Carbonic acid, dimethyl ester	Fatty acid derivatives	estery			0.0007±0.0001	0.0026±0.0015	0.0009±0.0002	0	0.0006±0.0001	0.0019±0.0006	0.0018±0.0007	0.0015±0.0006	0.001±0.0002	0.0037±0.0025	0.0013±0.0003	0.0033±0.0005	0	0	0.0011±0.0004	0.0692±0.033	0.0011±0.0001	0.0632±0.0046	0.0029±0.0008	0.0021±0.0003	0.0008±0.0002	0
E,E-3-Methyl-2,4-hexadiene	Fatty acid derivatives				0*	0*	0.0212±0.0031*	0.0709±0.0255*	0.0285±0.0032*	0.0539±0.014*	0.0596±0.0227*	0.0411±0.015*	0.0268±0.0035	0.1258±0.0965	0.0258±0.0168*	0*	0.0507±0.0099	0.8419±0.4394	0*	0*	0*	0*	0.0017±0.0005*	0.0012±0.0001*	0.001±0.0001	0.0007±0.0002
Heptanal	Fatty acid derivatives	green	0.003	2	0*	0*	0*	0*	0.0011±0.0002*	0.0012±0.0004*	0*	0*	0*	0*	0.002±0.0005*	0*	0.0018±0.0004 O	0.007±0.0036	0*	0*	0*	0*	0.0015±0.0003*	*	0.0013±0.0001	0.0031±0.0001 O
Heptanoic acid, methyl ester	Fatty acid derivatives	fruity	0.004	6	0.0006±0.0003	0.0014±0.0003	0.0009±0.0002	0	0.0009±0.0001	0.0007±0.0003	0.0015±0.0005	0.0007±0.0002	0.0014±0.0003*	0.0035±0.0023*	0.0006±0	0.0002±0.00002	0	0	0*	0*	0*	0*	0.0005±0.0002	0.0002±0.0001	0.0005±0.00003	0.0018±0.0009
Hexanal	Fatty acid derivatives	green	0.0045	2	0.0702±0.0159 0	0.5709±0.4384 O	0.0576±0.0116 O	0.1825±0.0898 O	0.0851±0.0141 O	0.1621±0.0544 O	0.0514±0.0176 O	0.0447±0.0179 O	0.0586±0.0101 O	0.286±0.1967 O	0.1431±0.0505 O	0.0733±0.0119 O	0.0846±0.0128 O	0.7436±0.3486 O	0.0128±0.0025 O	0.7761±0.3996 O	0	0	0.0395±0.0129 O	0.023±0.0028 O	0.0302±0.0069 O	0.0389±0.0179 O
Hexanoic acid	Fatty acid derivatives	fatty	3	6	0.0067±0.0044	0.0181±0.0099	0.0106±0.0017	0	0	0	0.0195±0.0078	0.0071±0.0051	0.0247±0.0062*	0.131±0.057*	0.0113±0.0047	0	0	0	0	0*	0	0*	0.0136±0.0051	0.0061±0.0008*	0.0193±0.0028	0.0181±0.0081
Methyl acetate	Fatty acid derivatives	ethereal	1.7	4	0.0063±0.0026	0.0276±0.0092	0.0098±0.0011	0.0335±0.0166	0.0191±0.0028	0.0225±0.0075	0.0294±0.0114	0.0143±0.005	0.0187±0.0015	0.0429±0.0224	0.0125±0.0043	0.0113±0.0032	0.0193±0.0054	0.1028±0.057	0.008±0.0019	2.3488±1.6933 O	0.0103±0.0015	0.4381±0.0257	0.0164±0.0044	0.0126±0.0007	0.0191±0.0039	0.0414±0.0224
Methyl caprate	Fatty acid derivatives	fermented			0.0005±0.0002	0.0002±0.0002	0	0	0	0	0	0	0.0006±0.0001*	0.0001±0.0001*	0.0005±0.0002	0	0	0	0	0	0.0003±0.00004*	0.0101±0.0032*	0	0	0	0
Methyl caproate	Fatty acid derivatives	fruity	0.07	6	0.0039±0.0017	0.0102±0.0024	0.0074±0.0016	0.0071±0.0034	0.0111±0.0021	0.0075±0.0025	0.0207±0.0085	0.0053±0.0013	0.0155±0.0028*	0.0367±0.0271*	0.0044±0.0007	0.0013±0.0003	0.002±0.0002	0.0072±0.0032	0.0019±0.0007	0.0263±0.0216	0	0	0.0052±0.0017	0.0013±0.0003	0.0056±0.0004	0.0195±0.0103
Methyl caprylate	Fatty acid derivatives	waxy	0.2	6	0.0019±0.0007	0.0031±0.0007	0.0028±0.0007	0.0066±0.0033	0.0035±0.0005	0.0018±0.0006	0.0051±0.0017	0.002±0.001	0.0038±0.0008*	0.009±0.0065*	0.0027±0.0003	0	0	0	0.001±0.0002	0.7302±0.7129 O	0	0	0.0015±0.0003	0.0003±0	0.0011±0.0001	0.0028±0.0012
Methyl laurate	Fatty acid derivatives	waxy			0	0	0	0	0	0	0	0	0.0006±0.0001	0.0006±0.0003	0.006±0.0012*	0.0041±0.0005*	0	0	0.0004±0.0001	0.0279±0.0137	0.0006±0.0001	0.0183±0.002	0	0	0	0
Methyl linoleate	Fatty acid derivatives	oily			0	0	0	0	0	0	0.0006±0.0002	0.0003±0.00003	0.0006±0.0001*	0.0014±0.0008*	0	0	0	0	0.0002±0.0001	0.0201±0.0096	0.001±0.0002	0.0229±0.004	0	0	0	0
Methyl oleate	Fatty acid derivatives	fatty			0	0	0	0	0.0003±0	0.0004±0.0002	0	0	0.0007±0.0001*	0.0011±0.0006*	0	0	0	0	0.0004±0.0001	0.0208±0.0106	0	0	0	0	0	0
Methyl palmitate	Fatty acid derivatives	waxy	2	0	0.0225±0.0049	0.0176±0.0065	0.0479±0.0209	0.0086±0.0038	0.0668±0.0018	0.0103±0.0045	0.0644±0.0203	0.0076±0.0013	0.0993±0.0182*	0.0765±0.0343*	0	0	0.0097±0.001	0.0274±0.0123	0.0325±0.0069	1.2223±0.5857	0.0007±0.0001	0.0206±0.0043	0.0173±0.0105	0.0015±0.0001	0.0071±0.0008	0.0139±0.0031
Methyl pelargonate	Fatty acid derivatives	fruity			0.0039±0.0009	0.0046±0.0019	0.004±0.0011	0.002±0.0009	0.0047±0.0005	0.002±0.0006	0.0068±0.002	0.0013±0.0004	0.0081±0.0014*	0.0118±0.0072*	0.0034±0.0008	0	0.0012±0.00005	0	0.0017±0.0004*	0.2261±0.0571*	0.0006±0.0001	0.0395±0.0075	0.0025±0.0005	0.0007±0.0001	0.0022±0.0002	0.0024±0.0012
Methyl valerate	Fatty acid derivatives	fruity	0.02	6	0.0008±0.0002	0.001±0.0002	0.0009±0.0002	0.001±0.0004	0.001±0.0001	0	0.0021±0.0007*	0.0005±0.00002*	0.0009±0.0001	0	0.0012±0.0003	0	0	0	0.0005±0.0001	0	0	0	0.0009±0.0002	0	0.0007±0.00005	0
Pelargonic acid	Fatty acid derivatives	waxy	3	6	0	0	0.0005±0.0001	0.0009±0.0004	0.0009±0.0002	0.0001±0.0001	0	0	0.0009±0.0002*	0.0043±0.0023*	0.0006±0.0001	0.0006±0.0001	0	0	0.0003±0.00004	0.2068±0.1176	0	0	0	0	0	0
Pentanal	Fatty acid derivatives	fermented	0.012	6	0.0007±0.0002	0.0002±0.0002	0.0004±0.00004	0	0	0	0.0014±0.0005	0	0	0	0.0024±0.0007*	0*	0	0	0	0	0	0	0.001±0.0005	0.0001±0.0001	0.0004±0.00005	0
Propanoic acid, methyl ester	Fatty acid derivatives	fruity	0.098		0.0009±0.0002	0.0031±0.0015	0.0014±0.0004	0.0132±0.0062	0.0021±0.0003	0.005±0.0008	0.0025±0.001	0.0018±0.0004	0.0014±0.0002	0.0091±0.0076	0.0025±0.0007	0.0036±0.0008	0.0023±0.0003	0.0215±0.0098	0.0008±0.0003	0.0733±0.0341	0.0014±0.0002	0.0487±0.0064	0.0023±0.0008	0.0016±0.0003	0.0015±0.0002	0.002±0.0013
Furan, 2-methyl-	Furans	chocolate	3.5	2	0.0002±0.0001	0.0009±0.0003	0.0004±0.0001	0.0009±0.0004	0.0005±0.0002	0.0006±0.0001	0.0019±0.0007	0.0006±0.0003	0.0008±0*	0.0031±0.0025	0	0	0	0	0.0002±0.0001	0.0174±0.0109	0.0002±0.00003	0.0068±0.001	0.0002±0.00005	0.0003±0.0001	0.0004±0.0001	0.0007±0.0005
Furan, 2-pentyl-	Furans	fruity	0.006	2	0.0085±0.0026 O	0.0286±0.0174 O	0.0066±0.0015 O	0.0148±0.0067 O	0.0077±0.0013 O	0.0107±0.0038 O	0.0095±0.0035 O	0.0052±0.0018	0.007±0.0011 O	0.0264±0.0184 O	0.009±0.002 O	0.0036±0.0005	0.0027±0.0002 O	0.017±0.0075	0	0*	0*	0*	0.0058±0.0014*	0.0026±0	0.0035±0.0002	0.0081±0.0043 O
1H-Pyrazole	Nitrogen containing compounds				0	0	0	0	0.0008±0.0008*	0.0024±0.0012*	0	0	0	0	0	0	0	0	0	0	0.0044±0.0001*	0.0984±0.0106*	0	0	0	0
1-Pyrroline	Nitrogen containing compounds	ammoniacal			0	0	0.0151±0.0011*	0.0132±0.007*	0.0078±0.0013	0	0	0	0	0	0	0	0	0	0	0	0.0167±0.0024*	0.7366±0.1273*	0	0	0	0
4-Ethyl-2-methylpyrrole-3-carbonitrile	Nitrogen containing compounds				0.0021±0.0005	0.0073±0.0046	0.0019±0.0002	0	0.0024±0.0002	0.0022±0.0006	0.0048±0.0015	0.0016±0.0006	0.0023±0.0003	0.0062±0.0037	0.0034±0.0008	0	0	0	0	0*	0.0005±0.00004	0*	0.0023±0.0006*	0.0001±0.0001	0.002±0.0001	0.0018±0.0009
Methanamine, N-methoxy-	Nitrogen containing compounds				0.0006±0.0002	0.0038±0.0028	0.0001±0	0.0013±0.0005	0.0002±0.00004	0.0005±0.0001	0.0008±0.0002	0.0009±0.0004	0	0	0.0009±0.0004	0.0009±0.0003	0	0	0	0	0	0	0.0006±0.0002*	0.0012±0.0002*	0.0003±0.00003	0.0006±0.0003
Methyl nicotinate	Nitrogen containing compounds	herbal			0	0	0	0	0.0027±0.0006*	0.0002±0.0002*	0	0	0	0	0	0	0	0	0.0007±0.0001	0.0723±0.0443	0.0004±0.00002	0.0102±0.0008	0	0	0.0018±0.0001	0.0036±0.0012
Pyrazine, tetramethyl-	Nitrogen containing compounds	nutty	0.0026	3	0	0	0	0	0	0	0	0	0	0	0	0	0	0	0	0	0	0	0.0004±0.0001*	0	0	0
Pyridine	Nitrogen containing compounds	fishy	0.063	4	0.0239±0.0044*	0.0588±0.0247*	0.0134±0.0022	0.106±0.0426 O	0.0215±0.0015*	0.0447±0.0125*	0.0225±0.0093*	0.0087±0.0047*	0.01±0.0005*	0.0383±0.014*	0*	0*	0.0445±0.0045	0.4628±0.2161 O	0.0247±0.004	1.4236±1.3153 O	0.0002±0.0001	0.0119±0.0001	0.0339±0.0016	0.023±0.0088	0.0293±0.0041	0.0658±0.0214 O
3-Buten-1-ol, 1-phenyl-	Phenylpropanoids and benzenoids				0	0	0.0007±0.0001	0	0.0004±0.0001	0	0	0	0.0006±0.0001	0.0001±0.0001	0.0008±0.00001*	0.0005±0.0003*	0	0	0.0003±0.00002	0	0	0	0.0004±0.00004*	0.0001±0.00004*	0	0
Benzene, butyl-	Phenylpropanoids and benzenoids		0.0085	4	0.0023±0.0003*	0.0018±0*	0.0015±0.0002	0	0.0009±0.0002*	0.0006±0.0002*	0.0009±0.0001*	0.0008±0.00003*	0	0	0.0015±0.0002	0.0002±0.0002*	0	0	0.0007±0.0001	0	0.0002±0.00003	0.0077±0.0019	0.0008±0.0001	0.0005±0.0001	0.0007±0.00002	0.0007±0.0002
Benzyl acetate	Phenylpropanoids and benzenoids	floral	0.002	0	0	0	0	0	0	0	0.0082±0.0031* O	0.0015±0.0004*	0.0029±0.0005* O	0.0041±0.0025* O	0.0014±0.0001	0	0	0	0.0012±0.0004	0.0323±0.0268 O	0	0	0.0011±0.0003	0	0.0014±0.00004	0.0031±0.0014 O
Methyl benzoate	Phenylpropanoids and benzenoids	phenolic	0.00052	4	0.0052±0.0024 O	0.0082±0.0021 O	0.0044±0.0006 O	0.0062±0.003 O	0.013±0.0035 O	0.0054±0.0017 O	0.0389±0.0155 O	0.0056±0.002 O	0.0159±0.0023 O	0.0342±0.0247 O	0.0063±0.0019 O	0.0043±0.0006 O	0.0036±0.0001 O	0.0151±0.0071 O	0.0035±0.0008 O	0.1777±0.0795 O	0.0022±0.00003 O	0.0743±0.0214 O	0.0047±0.001 O	0.0015±0.0001 O	0.0126±0.0016 O	0.0153±0.0076 O
Naphthalene	Phenylpropanoids and benzenoids	pungent	0.006	3	0.006±0.0017 O	0.0183±0.0117 O	0.0051±0.0005	0.0087±0.004 O	0.0056±0.0007	0.0047±0.0014	0.0116±0.0038 O	0.0032±0.0012	0.0062±0.0009 O	0.015±0.0099 O	0.0098±0.0023 O	0.0034±0.0004	0	0	0*	0*	0.0005±0.0001	0.0066±0.0024 O	0.0061±0.0013 O	0.0017±0.0002	0.005±0.0002	0.0039±0.0021
Phenylacetaldehyde	Phenylpropanoids and benzenoids	floral	0.004	2	0.0019±0.0007	0.003±0.0017	0.0011±0.0002	0	0.0025±0.0004	0.0012±0.0005	0.0096±0.0037 O	0.0009±0.0004	0.0027±0.0005	0.0041±0.0028 O	0.0015±0.0004	0	0.0003±0.0001	0.0068±0.0033 O	0	0	0.0001±0.00001*	0.0189±0.002* O	0.0007±0.0001	0	0	0
Phenylethyl alcohol	Phenylpropanoids and benzenoids	floral	1.1	2	0.0061±0.0032*	0.0071±0.0038*	0.0031±0.0007	0.0001±0.00004	0	0	0	0	0.0049±0.0008	0	0	0	0	0	0	0	0.0003±0.00004*	0.0309±0.0043*	0.0029±0.001	0	0	0
Dimethyl disulfide	Sulfur containing compounds	sulfurous	0.00016	6	0	0	0.0003±0.0001* O	0.0024±0.001* O	0.0004±0.0001 O	0.0013±0.0004 O	0	0	0	0	0	0	0	0	0	0	0	0	0	0	0	0
Dimethyl sulfide	Sulfur containing compounds	sulfurous	0.00074	5	0.0006±0.0001*	0.0029±0.0017* O	0.0009±0.0001* O	0.0037±0.0015* O	0.001±0.0003* O	0.0021±0.0006* O	0.0007±0.0003*	0.0006±0.0001*	0.0012±0.0002 O	0.0057±0.0042 O	0.0019±0.0003* O	0.0042±0.0006 O	0.0026±0.0007 O	0.031±0.0144 O	0.0008±0.0001 O	0.0826±0.0639 O	0.0014±0.0002 O	0.1062±0.0035 O	0.0016±0.0003 O	0.0013±0.0002 O	0.0012±0.0001 O	0.0015±0.001 O
2-Cyclohexen-1-one, 2,6,6-trimethyl-	Terpenes				0.0009±0.0004*	0*	0	0	0	0	0	0	0	0	0	0	0	0	0	0	0.0002±0.0000001	0.0137±0.0059	0	0	0	0
Hexahydrofarnesyl acetone	Terpenes	floral			0.0004±0.0001*	0.0001±0.0001*	0	0	0	0	0	0	0	0	0	0	0	0	0	0	0.1127±0.0241*	1.2235±0.2158*	0	0	0	0
Ketoisophorone	Terpenes	musty			0.0009±0.0004	0.0006±0.0002	0.0006±0.0001	0.0003±0.0001	0.0008±0.0002	0.0001±0.00005	0.0013±0.0005	0.0001±0.00005	0.0008±0.0001	0.0007±0.0005	0.0019±0.0003*	0.0005±0.0001*	0	0	0.0002±0.0001	0.0081±0.0042	0	0	0.0008±0.0001	0	0.0005±0.00002	0.0003±0.0001
Menthol	Terpenes	mentholic	0.92	6	0	0	0	0	0	0	0	0	0.0003±0.0001*	0.0005±0.0003*	0	0	0	0	0	0	0	0	0	0	0	0
Taste compounds
Glycine, N,N-dimethyl- (1TMS)	Amino acids and derivatives				0.3255±0.0449	0.4095±0.0035*	0.3496±0.0259	0.0969±0.0056*	0.2685±0.0194*	0.1638±0.0821	0.3816±0.0496*	0.1365±0.0194	0.4565±0.0149	0.1858±0.0196	0.1858±0.0196	0.6377±0.0177	0.3724±0.0014	0.2709±0.036	0.3902±0.0935	0.4322±0.0189	0.4493±0.037	0.5038±0.0309	0.5225±0.0154	0.5778±0.0526	0.4796±0.0272	0.2871±0.0744
Valine (1TMS)	Amino acids and derivatives	bitter			2.4525±0.0372*	1.5051±0.0892*	1.9386±0.3023*	1.3285±0.0264*	1.3608±0.0248*	1.0062±0.0733*	1.469±0.0377*	0.9644±0.014	1.262±0.071	0.7269±0.0535	0.7269±0.0535	2.0842±0.1093	0.8255±0.0603	0.2268±0.013	1.4933±0.6176	1.6964±0.2364	1.2727±0.1614	1.0715±0.0863	1.7753±0.3714	1.8309±0.0309	1.1794±0.4143	0.7266±0.025
Sarcosine (2TMS)	Amino acids and derivatives	sweet			2.7715±0.3274*	0.8386±0.0558	2.9875±0.5995*	0.995±0.0154	2.3963±0.0488*	1.0375±0.0846*	1.9725±0.1424	0.7928±0.0202	2.1387±0.2247	0.9326±0.1412	0.9326±0.1412	3.4098±0.0209	0.9986±0.1181	1.5835±0.4156	2.5077±1.054	2.652±0.145	1.1557±0.3696	0.8935±0.0569	1.1434±0.0566	1.4498±0.1323	1.0482±0.3222	0.4333±0.1152
Leucine (1TMS)	Amino acids and derivatives	bitter			1.0322±0.0316*	0.5155±0.027*	1.1253±0.4669	0.46±0.0043*	0.5996±0.0346*	0.4743±0.038*	0.5538±0.0072*	0.3966±0.0055	0.5205±0.0321	0.334±0.0096	0.334±0.0096	0.9765±0.062	0.4197±0.0207	0.2047±0.0258	0.7458±0.2315	0.7409±0.103	0.5557±0.0731	0.4631±0.0319	0.807±0.1752	0.8532±0.0151	0.5433±0.1894	0.345±0.0051
Isoleucine (1TMS)	Amino acids and derivatives	bitter			1.0765±0.0766*	0.4703±0.0145*	0.9862±0.306	0.4409±0.0049*	0.7373±0.0271*	0.5204±0.0437*	0.6299±0.0091*	0.3617±0.0069	0.7223±0.0369	0.4265±0.0157	0.4265±0.0157	1.0232±0.0671	0.5234±0.0282	0.2111±0.0254	0.7714±0.2392	0.7939±0.1053	0.5882±0.0855	0.4905±0.0368	0.8793±0.206	0.9378±0.0118	0.6027±0.2085	0.3806±0.0157
Serine (2TMS)	Amino acids and derivatives	sweet			0.6236±0.0195*	0.3798±0.0182*	0.7471±0.217	0.4131±0.0029*	0.4789±0.0323*	0.3946±0.0233	0.4097±0.008*	0.2808±0.0042	0.4281±0.0261	0.3052±0.0013	0.3052±0.0013	0.6966±0.0319	0.225±0.0164	0.1193±0.0072	0.5436±0.2034	0.6018±0.0304	0.413±0.1003	0.3033±0.0025	0.5796±0.1355	0.6703±0.0346	0.3683±0.1933	0.2042±0.011
Norleucine (2TMS)	Amino acids and derivatives				0.51±0.0733*	0.1835±0.0146	0.5871±0.2373	0.1394±0.0041	0.3207±0.0236*	0.1738±0.0092*	0.2433±0.0054*	0.1382±0.002	0.2112±0.0185	0.1295±0.0168	0.1295±0.0168	0.5404±0.0258	0.1542±0.0089	0.4717±0.135	0.3289±0.1241	0.3515±0.0268	0.2842±0.0307	0.2056±0.0265	0.3224±0.0603	0.3588±0.0417	0.2265±0.0752	0.1493±0.0152
Proline (2TMS)	Amino acids and derivatives	sweet			0.4021±0.0908*	0.0842±0.0107	0.4137±0.1144	0.0644±0.0286	0.2452±0.1112	0.1089±0.0045*	0.2105±0.0135*	0.0748±0.0038	0.5971±0.1048	0.1989±0.0254	0.1989±0.0254	1.0232±0.0345	0.1137±0.0086	0.4425±0.1333	0.472±0.2108	0.4644±0.03	0.3866±0.0414	0.2744±0.0575	0.3305±0.0371	0.3226±0.0717	0.2679±0.0234	0.2428±0.0076
Threonine (2TMS)	Amino acids and derivatives	sweet			0.5397±0.0059*	0.3034±0.0123*	0.5045±0.1223	0.3011±0.0033*	0.3575±0.0085*	0.253±0.0148*	0.366±0.007*	0.2267±0.0016	0.3151±0.0176	0.201±0.0038	0.201±0.0038	0.4978±0.0128	0.1815±0.0115	0.089±0.0103	0.3616±0.1192	0.3904±0.0266	0.2937±0.0522	0.2405±0.0096	0.3794±0.0709	0.3969±0.0042	0.2665±0.0825	0.1804±0.0053
Glycine (3TMS)	Amino acids and derivatives	sweet			2.8228±0.4494*	1.322±0.0334*	2.2043±0.3306	1.3818±0.0069*	1.8412±0.008*	1.1317±0.0199*	1.6429±0.0549*	1.0465±0.0085	1.6188±0.0673	1.0449±0.0375	1.0449±0.0375	2.2588±0.0461	1.2919±0.0835	0.9689±0.0779	1.9006±0.5737	2.1113±0.0802	1.6409±0.2526	1.367±0.0851	1.9277±0.2876	2.0733±0.0683	1.5556±0.2619	1.2038±0.0179
Aspartic acid (2TMS)	Amino acids and derivatives	umami			3.4114±0.0437*	2.8383±0.0306*	2.7802±0.2481*	2.5333±0.0329*	2.254±0.1373*	1.9523±0.1074*	3.4569±0.0542*	3.0013±0.0623	3.3287±0.0875	2.5678±0.0174	2.5678±0.0174	2.1941±0.0294	1.3657±0.0369	0.5769±0.0829	1.8362±0.4958	2.2579±0.0542	2.0826±0.1718	2.0075±0.052	2.9924±0.4937	3.15±0.0591	2.0951±0.5409	1.581±0.0863
Butanoic acid, 4-amino- (3TMS)	Amino acids and derivatives	meaty			3.8436±0.1064*	0.3354±0.0075	2.9155±0.0407*	0.4865±0.0111	1.3724±0.4345*	0.2518±0.0099	3.2891±0.2331	0.2699±0.0064	2.3379±0.0323	0.2993±0.0392	0.2993±0.0392	4.8595±0.235	1.2121±0.0378	0.4804±0.1101	1.4727±0.6619	1.5801±0.1555	1.5695±0.1063	1.5837±0.1028	1.4391±0.0441	1.6002±0.3156	1.2083±0.1079	0.8272±0.2049
Glutamic acid (2TMS)	Amino acids and derivatives	umami, yeasti			2.646±0.1583*	1.351±0.0956*	2.3577±0.263*	1.8187±0.0251*	1.6694±0.1964	1.2319±0.078*	2.0077±0.0415*	1.0718±0.0535	2.3402±0.1387	1.2562±0.0461	1.2562±0.0461	3.2726±0.1334	1.1923±0.0607	0.3867±0.1057	2.1767±0.7419	2.5982±0.2829	1.863±0.1833	1.7758±0.0949	2.5447±0.3873	2.4655±0.0969	1.591±0.3483	1.1143±0.0903
Phenylalanine (1TMS)	Amino acids and derivatives	bitter			0.587±0.0063*	0.3157±0.0105*	0.8495±0.2567	0.4463±0.0128*	0.394±0.0516*	0.322±0.0149*	0.4604±0.0035*	0.3043±0.0029	0.5905±0.0211	0.3598±0.0051	0.3598±0.0051	0.7283±0.035	0.4482±0.0125	0.2343±0.0152	0.5914±0.1353	0.6082±0.0588	0.4827±0.0627	0.4334±0.0231	0.7315±0.1492	0.8324±0.0215	0.5397±0.1663	0.3392±0.0234
Asparagine (2TMS)	Amino acids and derivatives	sweet			2.226±0.6286	1.0313±0.0981*	1.9608±0.1015*	0.7954±0.0292	1.5948±0.1759*	0.5866±0.0383*	2.0193±0.0114*	0.7229±0.0318	1.5638±0.1621	0.6387±0.0661	0.6387±0.0661	1.7785±0.0511	0.6551±0.051	0.5199±0.0958	1.4932±0.6247	1.7151±0.0366	1.5412±0.1162	1.3358±0.1315	1.6255±0.1785	1.3121±0.1575	0.8265±0.2091	0.6255±0.0552
Ornithine (3TMS)	Amino acids and derivatives	sweet			0.2997±0.0169	0.1014±0.0038	0.2149±0.0618	0.0504±0.0032	0.2037±0.0323*	0.0852±0.0052*	0.1943±0.021*	0.0681±0.001	0.2563±0.0326	0.1116±0.0124	0.1116±0.0124	0.5552±0.0143	0.1985±0.0283	0.1115±0.0184	0.2988±0.1224	0.3305±0.038	0.1965±0.1014	0.1287±0.014	0.1957±0.0199	0.2438±0.0203	0.1772±0.035	0.1108±0.0311
Lysine (3TMS)	Amino acids and derivatives	bitter			0.5006±0.0713	0.3401±0.0212*	0.8451±0.4035	0.2694±0.0098	0.4214±0.0919*	0.3516±0.0278*	0.3465±0.0094	0.2546±0.0023	0.3634±0.0423	0.2541±0.0275	0.2541±0.0275	0.5438±0.0366	0.2989±0.0285	0.2169±0.0304	0.3964±0.1287	0.4318±0.0647	0.2963±0.085	0.2675±0.0105	0.3251±0.0214	0.4062±0.02	0.2595±0.0968	0.1587±0.0385
Tyrosine (2TMS)	Amino acids and derivatives	bitter			0.8167±0.0258*	0.4314±0.0241*	0.6925±0.0668	0.4306±0.0113*	0.5331±0.0888*	0.4202±0.0254*	0.5619±0.0172*	0.3721±0.0076	0.6115±0.0188	0.3292±0.0449	0.3292±0.0449	0.7589±0.0186	0.4694±0.022	0.2126±0.028	0.6383±0.1593	0.7004±0.0494	0.5635±0.0815	0.572±0.02	0.9093±0.1638	0.9442±0.0419	0.6038±0.1841	0.4236±0.0173
Pantothenic acid, D- (Vitamin B5) (3TMS)	Amino acids and derivatives	sweet-bitter			0.2818±0.001*	0.1051±0.0094*	0.2041±0.0069	0.1±0.0005*	0.2365±0.0111*	0.092±0.0062*	0.2221±0.0088*	0.0999±0.0045	0.2015±0.0324	0.1013±0.0066	0.1013±0.0066	0.2282±0.0098	0.1782±0.0054	0.0744±0.0032	0.1817±0.0493	0.1773±0.0226	0.1911±0.0174	0.1809±0.0203	0.1933±0.0376	0.194±0.0493	0.1785±0.011	0.1683±0.0148
Tryptophan (2TMS)	Amino acids and derivatives	bitter			1.7411±0.3375*	0.7977±0.0537*	1.6793±0.1008*	0.7365±0.0067*	2.4308±0.5642*	1.2038±0.064*	4.3078±0.2659*	1.2637±0.0218	5.5181±0.1086	1.9897±0.0366	1.9897±0.0366	3.9781±0.1894	14.2366±0.5407	3.9523±0.3958	5.9751±0.3714	6.0212±0.2069	6.5679±0.261	6.5564±0.1306	5.4165±0.7123	4.0642±0.4166	13.0893±4.5039	14.5186±1.7949
Lactic acid (2TMS)	Organic acids	sour			0.425±0.0424*	0.2385±0.022*	0.3421±0.0518*	0.2911±0.0268*	0.3441±0.024*	0.3418±0.0227*	0.32±0.0303*	0.2939±0.0154	0.354±0.0359	0.5511±0.1432	0.5511±0.1432	0.3538±0.052	0.147±0.0146	0.1376±0.0197	0.1094±0.0057	0.1504±0.0111	0.1555±0.0227	0.1744±0.0169	0.1572±0.0319	0.1265±0.0044	0.1691±0.0225	0.166±0.0344
Phosphoric acid (3TMS)	Organic acids	sour, tangy			7.8191±0.2501*	2.3114±0.072*	4.0975±0.264*	2.1496±0.1533*	5.7441±0.5312*	2.8618±0.1143*	5.2317±0.1301*	2.339±0.089	4.6623±0.0822	2.5113±0.2139	2.5113±0.2139	6.0515±0.151	2.8101±0.0912	1.2453±0.0556	3.5241±1.1742	4.6539±0.0137	4.2864±0.2435	3.8299±0.2358	4.691±0.5163	3.7649±0.4422	3.5727±0.0794	3.4781±0.083
Succinic acid (2TMS)	Organic acids	sour			0.2547±0.0054*	0.1625±0.0065*	0.3488±0.0087*	0.3225±0.0044*	0.2719±0.0047	0.2403±0.0027*	0.3027±0.0067*	0.2584±0.0056	0.338±0.0032	0.3051±0.0264	0.3051±0.0264	0.3932±0.0132	0.2167±0.0073	0.1917±0.0048	0.2895±0.0457	0.2952±0.0181	0.3496±0.0365	0.3613±0.0141	0.3414±0.0102	0.3094±0.0222	0.3221±0.0103	0.3429±0.0065
Fumaric acid (2TMS)	Organic acids	sour			2.0173±0.0361*	1.3831±0.045*	1.3457±0.0261*	1.3281±0.0107*	1.4965±0.1218*	1.1809±0.042*	2.0953±0.0572*	1.7589±0.0558	1.9328±0.0489	1.6743±0.0454	1.6743±0.0454	1.9552±0.0253	1.0327±0.0263	0.8522±0.0703	2.524±0.7347	2.8814±0.1999	2.7003±0.1225	2.7235±0.0919	2.6058±0.0978	2.3035±0.0887	2.3636±0.0804	2.5989±0.1334
Malic acid (3TMS)	Organic acids	sour			4.3878±0.0786*	3.1306±0.072	3.2417±0.0455	3.2435±0.0076	3.8099±0.1414*	3.7489±0.0748*	4.2564±0.1027*	3.9335±0.1082	3.7202±0.1296	3.4396±0.0638	3.4396±0.0638	3.9618±0.0945	3.5558±0.0926	2.3598±0.3716	4.2172±0.3922	3.9745±0.3035	4.5722±0.4839	5.0348±0.2845	4.7259±0.0979	4.1095±0.1563	3.8247±0.1851	3.8623±0.144
Shikimic acid (4TMS)	Organic acids				0.3517±0.0162*	0.204±0.0104*	0.3244±0.0193*	0.183±0.0024*	0.2793±0.06*	0.1424±0.0142	0.2978±0.0165*	0.1916±0.0075	0.2647±0.0257	0.1747±0.0061	0.1747±0.0061	0.2687±0.0254	0.1844±0.0113	0.1408±0.0106	0.3445±0.1135	0.296±0.1197	0.1843±0.0035	0.1641±0.0096	0.2279±0.0377	0.2056±0.0188	0.1963±0.0261	0.1593±0.004
Citric acid (4TMS)	Organic acids	sour			3.7588±0.2986	0.8223±0.0188*	3.9292±0.088*	1.4102±0.0234	2.9359±0.1743*	0.8817±0.0211*	4.3465±0.2071*	1.1211±0.0668	4.1324±0.1025	1.7264±0.18	1.7264±0.18	2.9517±0.1741	2.9884±0.0601	1.1883±0.0941	2.4803±0.7643	2.962±0.1575	3.0887±0.0962	2.8191±0.2916	2.748±0.0965	1.7778±0.4057	2.2686±0.3972	2.2959±0.0346
Quinic acid (5TMS)	Organic acids	sour			0.8744±0.025*	0.6428±0.0279*	0.389±0.0054*	0.3315±0.0028*	0.4317±0.0276*	0.3783±0.0057*	0.3919±0.0199	0.2926±0.0047	0.3092±0.0098	0.2828±0.0071	0.2828±0.0071	0.4487±0.0039	0.5123±0.0178	0.5082±0.016	0.4556±0.0073	0.403±0.0062	0.3446±0.0337	0.3409±0.0098	0.3459±0.0083	0.3462±0.0092	0.3242±0.0193	0.341±0.0195
Gulonic acid (6TMS)	Organic acids				0.1536±0.0214	0.0491±0.0008*	0.134±0.0062*	0.0395±0.0015*	0.1919±0.0116*	0.0507±0.0013*	0.1619±0.0028*	0.0454±0.0016	0.2064±0.0046	0.085±0.016	0.085±0.016	0.2043±0.0188	0.165±0.005	0.0605±0.0009	0.173±0.0556	0.1595±0.0247	0.1683±0.0213	0.1502±0.0286	0.2202±0.0488	0.1887±0.0628	0.1325±0.0086	0.1182±0.0127
Galactopyranoside, 1-O-methyl-, alpha- (4TMS)	Suagrs				1.1427±0.0364*	0.0254±0.0254*	1.1173±0.0505*	0*	1.0991±0.0202*	0.0386±0.0386*	1.0769±0.0605*	0.0295±0.0295	0.7627±0.0096	0±0	0	0.5787±0.0738	0.9162±0.0134	0.2472±0.0253	0.6664±0.2432	0.5049±0.2271	0.701±0.2064	0.2907±0.2907	1.0427±0.0565	0.6117±0.2494	0.7591±0.1854	0.568±0.241
Tagatose (1MEOX) (5TMS) BP	Suagrs	sweet			0.1547±0.0513	0.0429±0.0054	0.1684±0.0633	0.0374±0.0058	0.13±0.0418*	0.0412±0.0128*	0.1045±0.0193*	0.0123±0.0123	0.082±0.0032	0.0604±0.0092	0.0604±0.0092	0.0292±0.0292	0	0.1163±0.0358	0.0641±0.0202	0.0568±0.0159	0.0607±0.0114	0.0683±0.0124	0.0699±0.0055	0.0414±0.0017	0.0704±0.0118	0.0806±0.0128
N-Acetylglucosamine_1_1MeOX_4TMS	Suagrs	sweet			0.0777±0.0013*	0.0559±0.0025	0.0769±0.0057*	0.0693±0.0007	0.0876±0.0005*	0.0733±0.0048*	0.0648±0.0026*	0.0588±0.0012	0.0497±0.003	0.0385±0.0029	0.0385±0.0029	0.0704±0.0006	0.0459±0.0026	0.0512±0.0051	0.0512±0.0066	0.0508±0.0026	0.0532±0.0013	0.0564±0.0022	0.07±0.0078	0.0688±0.0032	0.0472±0.0102	0.0445±0.0017
Inositol, myo- (6TMS)	Suagrs	sweet			2.8882±0.0163*	1.0144±0.0251	3.5804±0.1948*	1.713±0.025*	2.9332±0.1106*	1.2884±0.0271*	2.2125±0.0668*	0.8406±0.0193	2.2368±0.0834	1.1758±0.0858	1.1758±0.0858	3.4073±0.1267	2.3041±0.1295	1.1024±0.0313	2.5215±0.6579	2.7986±0.2099	2.8061±0.0574	2.6646±0.2268	4.2067±0.8374	4.0845±0.2337	3.1296±0.4345	2.431±0.0119
Galactitol (6TMS)	Suagrs	sweet			0.3095±0.015*	0.1±0.0044*	0.3074±0.0065*	0.1349±0.0027	0.2777±0.0029*	0.1282±0.0031*	0.3142±0.0069*	0.1244±0.0024	0.2725±0.0093	0.1271±0.0021	0.1271±0.0021	0.2097±0.0192	0.2535±0.008	0.1257±0.0062	0.2±0.0468	0.1698±0.038	0.2232±0.0482	0.2083±0.0378	0.2244±0.0214	0.1685±0.0391	0.1833±0.0236	0.1576±0.0346
Glycerol (3TMS)	Sugars	sweet			2.3133±0.044	1.4183±0.0564*	2.9049±0.6191	1.4288±0.0143*	2.6898±0.0832*	1.6329±0.0453*	2.2154±0.0667*	1.595±0.037	2.114±0.0591	2.7251±1.0679	2.7251±1.0679	2.5652±0.2399	2.2029±0.0814	1.65±0.0285	2.4328±0.3982	2.0748±0.3415	2.335±0.3156	1.9715±0.3695	2.0947±0.2161	1.8924±0.2189	1.8584±0.0821	1.829±0.4234
Glyceric acid (3TMS)	Sugars	sweet			0.1866±0.0085*	0.0447±0.0017	0.1157±0.0004*	0.0508±0.0004	0.0982±0.0055*	0.0422±0.001*	0.1388±0.0041*	0.0447±0.0009	0.0848±0.0016	0.0496±0.0067	0.0496±0.0067	0.1439±0.0105	0.1035±0.0014	0.0469±0.0026	0.1292±0.0384	0.1145±0.0242	0.1028±0.0058	0.0841±0.0153	0.1131±0.0217	0.0954±0.0195	0.0814±0.0004	0.0711±0.0095
Erythritol (4TMS)	Sugars	sweet			0.0671±0.0037*	0.0274±0.0009	0.064±0.002*	0.029±0.0011	0.0596±0.0035*	0.0317±0.0008*	0.0588±0.002*	0.0813±0.0017	0.0368±0.0002	0.0165±0.0009	0.0165±0.0009	0.1402±0.0083	0.0474±0.0013	0.0341±0.0037	0.0542±0.0122	0.0531±0.0072	0.0668±0.0098	0.0588±0.0083	0.0637±0.0057	0.0505±0.0094	0.0477±0.001	0.0419±0.0052
Threitol (4TMS)	Sugars	sweet			0.1919±0.0101*	0.1842±0.0092*	0.3487±0.1963	0.0949±0.0024	0.1438±0.0024*	0.1178±0.0029*	0.1318±0.0081*	0.0804±0.0013	0.0948±0.0031	0.0768±0.0072	0.0768±0.0072	0.6757±0.0346	0.1006±0.0048	0.107±0.0153	0.1344±0.0362	0.1457±0.0126	0.1871±0.0288	0.18±0.0236	0.1738±0.0058	0.138±0.0221	0.1053±0.0112	0.0981±0.0116
Erythronic acid (4TMS)	Sugars				0.2173±0.0092*	0.0299±0.0011*	0.1257±0.0046*	0.0387±0.0007	0.0901±0.0049*	0.0291±0.0006*	0.1542±0.0026*	0.03±0.0008	0.0836±0.0023	0.0382±0.002	0.0382±0.002	0.1503±0.0143	0.0878±0.0003	0.0352±0.0011	0.1121±0.039	0.1041±0.0252	0.1179±0.0195	0.0989±0.0194	0.1148±0.0176	0.0841±0.0265	0.0802±0.0085	0.0743±0.0093
Pectin (1MEOX) (4TMS) MP	Sugars	bitter			0.2691±0.0062*	0.1718±0.0084	0.319±0.0045*	0.1833±0.0015	0.3411±0.0096*	0.2847±0.0125	0.2824±0.0039*	0.2145±0.0017	0.2256±0.0084	0.1482±0.0025	0.1482±0.0025	0.305±0.0084	0.389±0.0157	0.2364±0	0.3011±0.0299	0.2729±0.0228	0.3243±0.03	0.3149±0.0254	0.2617±0.0239	0.2127±0.008	0.311±0.0435	0.3223±0.0254
Arabinose (1MEOX) (4TMS) BP	Sugars	sweet			0.5918±0.0005*	0.3041±0.0116*	0.6818±0.0268*	0.3582±0.0016*	0.7606±0.0287*	0.547±0.023*	0.5813±0.0136*	0.4018±0.0069	0.5817±0.0192	0.3781±0.0055	0.3781±0.0055	0.5362±0.0284	1.1167±0.049	0.6572±0.0206	0.7264±0.0145	0.6187±0.0577	0.5312±0.0186	0.4415±0.0488	0.5422±0.061	0.5344±0.0232	0.656±0.0524	0.6064±0.0585
Xylulose (4TMS)	Sugars	sweet			0.0415±0.0019*	0.0152±0.0022	0.0367±0.0009*	0.018±0.0002*	0.0263±0.0016*	0.0136±0.0004*	0.0268±0.0008*	0.0112±0.0003	0.0283±0.0012	0.0139±0.0006	0.0139±0.0006	0.0745±0.0097	0.0237±0.0014	0.0111±0.0008	0.0346±0.0115	0.032±0.006	0.0369±0.0049	0.0341±0.0056	0.0469±0.0101	0.0387±0.0101	0.0287±0.0009	0.029±0.0039
Xylitol (5TMS)	Sugars	sweet			0.3075±0.0106*	0.0496±0.0032*	0.2956±0.0056	0.07±0.0013	0.2585±0.0424	0.0757±0.0033	0.3042±0.0071*	0.0677±0.0015	0.3275±0.0071	0.0974±0.0061	0.0974±0.0061	0.2376±0.0131	0.2577±0.0103	0.1073±0.0108	0.1824±0.0481	0.1587±0.0161	0.1911±0.0208	0.1434±0.03	0.2314±0.0475	0.2077±0.0499	0.1941±0.015	0.1593±0.029
Glucose, 1,6-anhydro-, beta- (3TMS)	Sugars	sweet			0.0538±0.011	0.0234±0.001	0.0271±0.0004*	0.0226±0.0005	0.0591±0.0169*	0.0286±0.0033*	0.0443±0.0047*	0.0271±0.0041	0.03±0.0033	0.0311±0.0079	0.0311±0.0079	0.0187±0.0012	0.0233±0.0008	0.0258±0.0038	0.0211±0.0042	0.0305±0.0018	0.0337±0.0025	0.0314±0.0053	0.0394±0.0027	0.0365±0.0073	0.033±0.0011	0.0393±0.0044
Lyxonic acid (5TMS)	Sugars				0.2983±0.0142*	0.0469±0.0016	0.2304±0.003*	0.0773±0.001*	0.186±0.0143*	0.0557±0.0045*	0.2126±0.007	0.0438±0.0009	0.1713±0.0098	0.062±0.0006	0.062±0.0006	0.2102±0.0258	0.1323±0.0056	0.0434±0.0017	0.1549±0.0545	0.1364±0.0314	0.1314±0.0144	0.1088±0.0222	0.148±0.0285	0.1127±0.0288	0.1112±0.0088	0.1111±0.0051
Glucose, D- (4TMS)	Sugars	sweet			1.9471±0.0394	1.0487±0.0239	1.4953±0.0786	1.0244±0.0246	1.4031±0.1021*	0.9359±0.0296*	1.4939±0.0364*	0.9464±0.0217	1.873±0.088	1.3231±0.0508	1.3231±0.0508	1.5351±0.0112	1.7608±0.0848	1.0684±0.0972	1.5497±0.0757	1.5554±0.0188	1.443±0.1035	1.4754±0.0721	1.4167±0.0492	1.3032±0.0365	1.4223±0.0835	1.4947±0.0101
Arabinonic acid (5TMS)	Sugars				0.1235±0.0086	0.0257±0.0006*	0.0882±0.0011*	0.0261±0.0008*	0.0947±0.007*	0.0312±0.0006*	0.1073±0.0014*	0.0298±0.0015	0.0896±0.0025	0.036±0.0021	0.036±0.0021	0.1172±0.0105	0.1069±0.0028	0.0379±0.0015	0.0857±0.0252	0.0803±0.0145	0.0941±0.0134	0.0831±0.0157	0.1035±0.0176	0.0858±0.019	0.0831±0.0063	0.0788±0.01
Icose (1MEOX) (5TMS) BP	Sugars				0.1038±0.0098*	0*	0.077±0.006	0.0448±0.0023	0.0805±0.0114*	0.0499±0.0012*	0.0534±0.0041*	0.0361±0.0024	0.052±0.0034	0.0693±0.0319	0.0693±0.0319	0.1095±0.0059	0.0605±0.0018	0.0355±0.0054	0.0739±0.0125	0.0635±0.0086	0.0623±0.0096	0.0509±0.003	0.0637±0.007	0.0538±0.004	0.0503±0.0018	0.0472±0.0038
Sorbose (1MEOX) (5TMS) BP	Sugars	sweet			5.9817±0.1414	5.0159±0.1389	6.2588±0.309	5.2158±0.0406	7.1336±0.0766*	6.5899±0.222*	4.8534±0.1668*	5.1468±0.1041	6.0957±0.3328	7.2459±2.1493	7.2459±2.1493	7.2886±0.1423	6.0845±0.2573	3.7673±0.5691	6.8321±0.716	6.1229±0.606	5.7511±0.5134	5.3137±0.4156	5.4953±0.1213	4.76±0.096	5.9232±0.5272	6.0972±0.2112
Fructose (1MEOX) (5TMS) BP	Sugars	sweet			3.7077±0.1455	3.0946±0.1036	4.0719±0.4013	3.2678±0.0119	4.5451±0.0796*	4.1693±0.1327*	2.7786±0.0572*	3.1628±0.0645	3.722±0.2432	4.9158±1.652	4.9158±1.652	4.802±0.124	3.7202±0.1151	2.6203±0.311	4.6074±0.5445	4.0902±0.4211	3.6652±0.3607	3.3474±0.2646	3.418±0.0462	2.9538±0.0593	3.827±0.3522	3.9847±0.1302
Idose (1MEOX) (5TMS) MP	Sugars	sweet			0.2355±0.0405	0.2401±0.0393	0.5415±0.007*	0.4634±0.005	0.4056±0.0166	0.3289±0.0454*	0.2963±0.0076*	0.3198±0.0043	0.345±0.048	0.4272±0.0995	0.4272±0.0995	0.2655±0.0457	0.3348±0.0452	0.3846±0.0477	0.374±0.0174	0.3451±0.0137	0.3044±0.0257	0.3116±0.0071	0.261±0.0361	0.2372±0.024	0.3802±0.0656	0.4816±0.0115
Galactose (1MEOX) (5TMS) MP	Sugars	sweet			3.6021±0.051	3.0928±0.1071	6.3485±2.5137	3.1597±0.0146*	3.7031±0.0468*	3.2405±0.053	2.8581±0.0569*	2.7056±0.0567	3.7214±0.0983	5.3349±2.1907	5.3349±2.1907	3.9629±0.077	3.903±0.1668	2.6999±0.121	4.0166±0.4055	3.8195±0.2542	3.3185±0.1863	3.0606±0.2121	3.1191±0.1456	3.12±0.0758	3.5225±0.2486	3.8274±0.0792
L-Rhamnose (4TMS)	Sugars	sweet			0.3597±0.0203	0.1386±0.0032	1.5039±1.143	0.1409±0.0368	0.4624±0.032*	0.1625±0.0116*	0.4399±0.0197*	0.1382±0.0244	0.3288±0.0709	0.2159±0.0082	0.2159±0.0082	0.1994±0.0061	0.3009±0.0088	0.2885±0.0488	0.2254±0.0196	0.2111±0.0034	0.2224±0.0242	0.2632±0.0044	0.2801±0.0264	0.2216±0.0214	0.2002±0.0475	0.1642±0.0146
Mannitol (6TMS)	Sugars	sweet			0.938±0.0078*	0.9848±0.0012*	0.9498±0.0042*	0.9647±0.0059	0.9668±0.0061*	0.9967±0.0096*	0.9648±0.0106*	0.9975±0.014	0.959±0.0132	1.0366±0.0232	1.0366±0.0232	0.9581±0.0039	0.9758±0.0031	0.7467±0.0606	0.9472±0.0084	0.9305±0.0078	0.9561±0.0178	0.9794±0.0166	0.938±0.0013	0.947±0.0025	0.9612±0.0137	0.9476±0.0099
Glucuronic acid (1MEOX) (5TMS) MP	Sugars	sweet			0.1238±0.0067*	0.1106±0.0055*	0.0998±0.0035*	0.0881±0.0012	0.1957±0.0212*	0.1681±0.0055*	0.1095±0.0076*	0.1093±0.0036	0.1323±0.0071	0.1212±0.0045	0.1212±0.0045	0.1465±0.0029	0.0739±0.0021	0.0681±0.0066	0.0885±0.0204	0.076±0.011	0.084±0.0084	0.0613±0.0159	0.0824±0.0064	0.0615±0.0035	0.079±0.007	0.0799±0.0052
Saccharic acid (6TMS)	Sugars				0.475±0.0388*	0.0386±0.0023*	0.3123±0.0343*	0.0492±0.0016*	0.244±0.0423*	0.0415±0.0013*	0.5878±0.0154*	0.0741±0.0027	0.0307±0.0044	0.0135±0.002	0.0135±0.002	0.0968±0.0155	0.1506±0.0164	0.0207±0.0004	0.1124±0.0451	0.0829±0.041	0.1106±0.0343	0.0699±0.0321	0.0642±0.0113	0.0369±0.0185	0.0291±0.004	0.0243±0.0101
Sucrose (8TMS)	Sugars	sweet			46.2317±1.1445	26.5283±0.5182	40.038±0.7994	26.7963±0.3121	45.536±0.5415*	26.4436±0.8824*	42.6123±1.3001*	22.7607±0.8905	49.5221±3.0508	29.245±1.5175	29.245±1.5175	39.7444±0.8222	42.6027±2.0718	18.8064±3.0442	40.8302±6.4802	43.0306±2.6839	39.8724±1.5366	39.7102±1.9648	44.2093±2.3127	36.522±1.9972	44.2348±4.5151	45.0314±1.3539
Lactose 1MeOX_8TMS	Sugars	sweet			0.4638±0.0578	0.0719±0.0064*	0.4466±0.0334	0.122±0.0176	0.3664±0.0316	0.0995±0.0128	0.5342±0.0554	0.0842±0.0171	0.3558±0.0298	0.2449±0.0448	0.2449±0.0448	0.6225±0.0154	0.5186±0.0537	0.1819±0.0154	0.528±0.1442	0.5624±0.0626	0.4992±0.1121	0.468±0.0051	0.4021±0.0149	0.3526±0.0078	0.3543±0.0301	0.4402±0.0206
Cellobiose, D- (1MEOX) (8TMS) MP	Sugars	sweet			0.2469±0.0114*	0.2295±0.0121	0.2658±0.0274*	0.2579±0.0072	0.0304±0.0304*	0.1227±0.0048*	0*	0.1421±0.0012	0*	0.1769±0.0079	0.1769±0.0079	0.2718±0.0068	0	0.1653±0.0334	0.2362±0.0582	0.3595±0.0184	0.2227±0.0402	0.2887±0.0084	0.2579±0.0097	0.291±0.0328	0.2187±0.0473	0.2516±0.0031
Maltose (1MEOX) (8TMS) MP	Sugars	sweet			5.713±0.2192	7.0751±0.182*	7.5083±0.0687*	9.1145±0.0499*	5.5863±0.2162*	6.409±0.1402*	5.4386±0.0997*	6.6225±0.1505	7.3568±0.3053	7.9624±0.7321	7.9624±0.7321	10.164±0.8044	5.3922±0.0391	4.7214±0.5504	8.6178±1.1356	10.2937±0.4043	9.3084±0.9314	10.4448±0.0617	10.88±0.1654	11.2932±0.9201	10.5488±0.9279	11.9545±0.5798
alpha-D-Galactopyranosyl-(1,4)-D-galactopyranoside (1MEOX) (8TMS) MP	Sugars				0.125±0.0086*	0.1492±0.0127*	0.1374±0.0265*	0.1097±0.0113*	0.1501±0.0054*	0.1519±0.0083*	0.1291±0.0189*	0.1707±0.014	0.2552±0.0349	0.1831±0.0123	0.1831±0.0123	0.2367±0.0148	0.2589±0.004	0.2518±0.0118	0.2217±0.0822	0.1434±0.0227	0.1591±0.0595	0.1486±0.0408	0.1293±0.0204	0.1633±0.0181	0.1791±0.0287	0.2302±0.0216
Galactinol (9TMS)	Sugars				13.836±0.4727	6.2351±0.1208	14.1181±0.4396	7.0778±0.1326	15.4886±0.3861*	6.4668±0.1844*	15.6769±0.629*	6.3434±0.1773	15.8658±0.778	8.2417±0.0906	8.2417±0.0906	15.8296±0.4655	13.6528±0.9554	5.738±0.69	14.4117±3.1938	15.7946±1.2477	15.4951±0.4446	15.5288±1.2327	17.0019±1.1949	13.2348±0.8238	15.1275±1.2349	13.7355±0.276
Raffinose (11 TMS)	Sugars	sweet			33.7153±0.8201*	16.7594±0.2462	31.2619±1.2284*	19.2263±0.3161	33.1345±0.2513*	18.1425±0.7618*	31.4295±0.7566*	16.6942±1.0429	24.8596±3.205	15.132±0.7952	15.132±0.7952	27.0493±0.9758	43.8831±1.7662	20.9053±4.7197	43.4563±4.3786	43.6198±2.6371	44.6315±2.4358	47.9006±2.6441	52.3245±1.8641	43.843±1.4184	50.8981±3.958	52.0263±2.3297
Lactitol (9TMS)	Sugars	sweet			1.886±0.0915	2.3096±0.0494*	2.5235±0.0315*	3.1277±0.027*	1.6935±0.0629*	2.0708±0.0681*	1.7679±0.0553*	2.2242±0.0622	2.423±0.0772	2.9383±0.316	2.9383±0.316	3.9015±0.253	1.7412±0.0182	1.7488±0.1349	3.0799±0.507	3.7029±0.3533	3.4809±0.4197	3.8941±0.1079	4.1334±0.0434	4.2743±0.3106	3.8808±0.4834	4.6379±0.1994
Melibiose (1MEOX) (8TMS) MP	Sugars	sweet			0.2414±0.0299*	0.0702±0.0066*	0.4692±0.1979	0.0805±0.0023*	0.3318±0.0253*	0.0892±0.0061*	0.2547±0.0215*	0.0656±0.0046	0.2891±0.0137	0.167±0.0712	0.167±0.0712	0.1714±0.009	0.3575±0.0016	0.1249±0.0046	0.2309±0.048	0.2977±0.0163	0.3524±0.0299	0.367±0.0167	0.2934±0.0314	0.2156±0.0198	0.3605±0.082	0.3227±0.0397
